# Supplementary material
Source: MDPI journal article supplement (https://www.mdpi.com/2073-4433/14/6/1036)
Supplement: s1 [file s1]

Supplementary Materials

# Evasion of Gaseous Elemental Mercury from forest and urban soils contaminated by historical and modern ore roasting processes (Idrija, Slovenia)

Federico Floreani <sup>1\*</sup>, Elena Pavoni <sup>1</sup>, Mateja Gosar <sup>2</sup> and Stefano Covelli <sup>1</sup>

**Table S1.** Summary of Hg content in soils, calculated Hg<sup>0</sup> fluxes at soil-air interface and main meteorological parameters recorded during sampling on all measuring plots.

| Site | Plot | Land Cover       | Soil Hg                      |           |           | Hg <sup>0</sup> flux<br>(ng m <sup>-2</sup> h <sup>-1</sup> ) | Soil T<br>(°C) | UV rad.<br>(W m <sup>-2</sup> ) | Air T<br>(°C) |
|------|------|------------------|------------------------------|-----------|-----------|---------------------------------------------------------------|----------------|---------------------------------|---------------|
|      |      |                  | Total (mg kg <sup>-1</sup> ) | α-HgS (%) | Hg-OM (%) |                                                               |                |                                 |               |
| ID1  | A    | Grass            | 8.91                         | 52.8      | 40.1      | 85.3                                                          | 25             | 21.4                            | 30.3          |
|      | B    | Grass            | 7.32                         | 52.0      | 48.0      | 70.7                                                          | 26             | 19.8                            |               |
|      | C    | Grass            | 13.1                         | 48.9      | 50.1      | 71.5                                                          | 24             | 18.3                            |               |
| ID2  | A    | Grass            | 219                          | 87.4      | 25.5      | 687                                                           | 28             | 33.3                            | 31.3          |
|      | B    | Grass            | 152                          | 78.3      | 29.1      | 702                                                           | 26.5           | 27.8                            |               |
|      | C    | Grass            | 128                          | 78.9      | 24.4      | 427                                                           | 28             | 27.8                            |               |
| ID3  | A    | Grass            | 205                          | 36.1      | 59.4      | 458                                                           | 28             | 29.1                            | 31.1          |
|      | B    | Grass            | 225                          | 29.7      | 65.9      | 445                                                           | 29             | 25.4                            |               |
|      | C    | Grass            | 120                          | 22.0      | 72.9      | 392                                                           | 30             | 18.2                            |               |
|      | D    | Bare soil        | 171                          | 37.9      | 57.6      | 538                                                           | 32             | 21.4                            |               |
| PS1  | A    | Grass            | 13.3                         | 64.9      | 35.1      | 198                                                           | 27             | 35.4                            | 30.3          |
|      | B    | Grass            | 22.8                         | 60.5      | 39.5      | 171                                                           | 27             | 36.9                            |               |
|      | C    | Grass            | 11.1                         | 52.8      | 47.2      | 70.8                                                          | 27             | 15.2                            |               |
| PS2  | A    | Forest + litter  | 10400                        | 47.2      | 17.2      | 290                                                           | 23             | 0.8                             | 26.6          |
|      | A_r2 | Forest bare soil |                              |           |           | 333                                                           | 24             | 0.9                             |               |
|      | B    | Forest + litter  | 6815                         | 54.6      | 28.6      | 160                                                           | 21             | 0.9                             |               |
|      | B_r2 | Forest bare soil |                              |           |           | 317                                                           | 19.5           | 0.8                             |               |
|      | C    | Forest bare soil | 2184                         | 59.1      | 22.4      | 2466                                                          | 20             | 1.5                             |               |
